# Supplementary material for: Women’s Awareness of Colon Cancer Screening in Real-world Clinical Setting in Nagasaki, Japan: a descriptive cross-sectional study
Source: Research Square preprint supplement (doi:10.21203/rs.3.rs-6426323/v1), 2025-05-20
Supplement: Supplementary file 1 [file 027e5e6b7b9abca95332bb49.docx]

Questionnaire on Colorectal Cancer Screening and Colonoscopy for Women

M. Tabuchi

Nagasaki University, Department of Gastroenterology and Hepatology/Histology and Cell Biology

We kindly request the cooperation of all women.

Answers to this questionnaire are voluntary and not compulsory.

This questionnaire is anonymous and does not contain any personal information.

If you do not agree with this survey, you do not need to respond and can leave a blank answer.

The facility will not have access to anyone’s responses.

The results of this survey will be used for future countermeasures and educational activities.

Colorectal cancer is the leading cause of cancer death among women in Japan, and Nagasaki Prefecture has the highest female colorectal cancer mortality rate in Japan (2020). The purpose of this questionnaire was to identify clues to improve the rate of colorectal cancer screening and colonoscopy in Nagasaki Prefecture. After answering the questionnaire (including blank answers), please place your answers in an envelope and hand them to the receptionist (or drop them into the collection box).

If you agree to this survey, please check the right checkbox ⬜︎ and check ☑︎. 　 ⬜.

There are a total of 10 questions (approximately 5 minutes). Please fill in the form (circle/ free text) as much as you can answer. *You can also answer the questions using Google Forms. In that case, please refrain from answering the questions in this paper.

Age ・20’s ・30’s ・40’s ・50’s ・60’s ・70’s ・80’s

Do you think symptoms are common with colorectal cancer?

・I think so. ・I do not think so. ・I have no idea.

Do you know that the 5-year survival rate of colorectal cancer is more than 95% if the disease is detected at an early stage?

・Yes ・No

Do you know that fecal immunochemical tests (FITs) are the first step in screening for colorectal cancer?

・Yes ・No

Have you ever taken the FITs?

・Every year ・Within 2 years ・Over 2 years before

・Never had ・I have not had the FITs because I have a colonoscopy regularly.

If your colorectal cancer screening (FITs) results are positive, what will you do?

・Take another fecal occult blood test at a medical institution.

・Do not visit a medical institution because I have no symptoms.

・Take a colonoscopy screening

・I have no idea.

・Others ( )

Do you know that colonoscopy is recommended for colorectal cancer screening (fecal occult blood test) if you have symptoms such as "constipation," "diarrhea," or "anemia"?

・Yes ・No

Have you ever undergone a colonoscopy?

・Yes ・No

If you had a colonoscopy, please feel free to provide any advice you would like to give to healthcare professionals promoting colonoscopy in the future (e.g., sedation, information sources, and pain care).

（Free writing space ）

If you have never undergone a colonoscopy, please tell us why and what your impressions of colonoscopy are. (multiple answers allowed.)

・No abnormalities during health checkups

・No subjective symptoms ・Busy or financial concerns

・Seems painful ・Embarrassing ・Resistant for laxatives use

・I do not know what kind of examination the colonoscopy is.

・I do not know where I can get it.

・I do not know where I can get a colonoscopy with a sedation.

・No information about colonoscopy is available online.

・A slight bleeding is likely hemorrhoids.

・It is thought to be usual constipation.

・I am afraid of finding a disease.

・I would like to have a female physician.

・I have no problem because I have regular defecations.

・Other（ ）

Thank you very much for your comments.
