# Supplementary material for: Women’s Awareness of Colon Cancer Screening in Real-world Clinical Setting in Nagasaki, Japan: a descriptive cross-sectional study
Source: Research Square preprint supplement (doi:10.21203/rs.3.rs-6426323/v1), 2025-05-20
Supplement: Supplementary file 3 [file 8c8fe7e0e7f97a6efbc0c81a.docx]

Supplemental table 1. Understanding of colon cancer (CC) and colorectal screening across age groups and residency

|  | | Total n= 1,180a | | Young adults  20-39 years n=193 | | Middle-aged adults  40-69 years n=722 | | Older adults  ≥ 70 years n=265 | |
| --- | --- | --- | --- | --- | --- | --- | --- | --- | --- |
|  | | Urban  n = 1,120 | Rutal  n = 60 | Urban  n = 187 | Rural  n = 6 | Urban  n = 678 | Rural  n = 44 | Urban  n = 255 | Rural  n = 10 |
|  | | n (%) | | n (%) | | | | | |
| Knowledge about | |  | |  | | | | | |
|  | CCb often lacks symptoms | 482 (41) | | 86 (44) | | 317 (44) | | 89 (34) | |
| 461(59) | 21 (35) | 84 (45) | 2 (33) | 291 (43) | 16 (36) | 86 (34) | 3 (30) |
|  | Detect early; survive longer | 469 (40) | | 56 (29) | | 295 (41) | | 118 (45) | |
| 442 (39) | 27 (45) | 54 (29) | 2 (33) | 276 (41) | 19 (43) | 112 (44) | 6 (60) |
|  | First screening; FITsc | 984 (83) | | 138 (72) | | 629 (87) | | 217 (82) | |
| 930 (83) | 54 (90) | 133 (71) | 5 (83) | 588 (87) | 41 (93) | 209 (82) | 8 (80) |
|  | Secondary screening; CSd | 962 (82) | | 137 (71) | | 610 (84) | | 215 (81) | |
| 930 (83) | 32 (53) | 133 (71) | 4 (67) | 588 (87) | 22 (50) | 209 (82) | 6 (60) |

aThirty participants with unknown residency status were excluded. bCC; Colorectal Cancer, cFITs, fecal immunochemical tests; dCS, colonoscopy.
