# Supplementary material for: Women’s Awareness of Colon Cancer Screening in Real-world Clinical Setting in Nagasaki, Japan: a descriptive cross-sectional study
Source: Research Square preprint supplement (doi:10.21203/rs.3.rs-6426323/v1), 2025-05-20
Supplement: Supplementary file 4 [file b65dda27b01ab0763af195a3.docx]

Supplemental Table 2. Reasons for not undergoing colonoscopy and perceptions of colonoscopy in those who had never undergone colonoscopy.

|  | | Total n= 747a | | Young adults  20-39 years n=174 | | Middle-aged adults  40-69 years n=465 | | Older adults  ≥ 70 years n=108 | |
| --- | --- | --- | --- | --- | --- | --- | --- | --- | --- |
|  | | Urban  n = 705 | Rural  n =42 | Urban  n = 168 | Rural  n = 6 | Urban  n = 433 | Rural  n =32 | Urban  n = 104 | Rural  n =4 |
|  | | n (%) | | n (%) | | | | | |
| Reasons for undoing CSb | |  | |  | | | | | |
|  | Health check; no abnormalities | 329 (44) | | 65 (37) | | 223 (48) | | 41 (38) | |
| 305 (43) | 24 (57) | 61 (36) | 4 (67) | 205 (47) | 18 (56) | 39 (38) | 2 (50) |
|  | No symptoms | 294 (39) | | 66 (38) | | 181 (39) | | 47 (43) | |
| 281 (40) | 13 (31) | 64 (38) | 2 (33) | 172 (40) | 9 (28) | 45 (43) | 2 (50) |
|  | Having regular defecation | 85 (11) | | 22 (13) | | 46 (10) | | 17 (15) | |
| 84 (12) | 1 (2) | 22 (13) | 0 (0) | 45 (10) | 1 (3) | 17 (16) | 0 (0) |
|  | Chronic constipation | 52 (7) | | 19 (11) | | 27 (6) | | 6 (5) | |
| 49 (7) | 3 (7) | 19 (11) | 0 (0) | 24 (6) | 3 (9) | 6 (6) | 0 (0) |
|  | Slight bleeding: possible hemorrhoid | 52 (7) | | 18 (11) | | 26 (5) | | 6 (6) | |
| 46 (7) | 4 (9) | 17 (10) | 1 (16) | 23 (5) | 3 (9) | 6 (6) | 0 (0) |
|  | Hesitant to disclose health condition | 60 (8) | | 15 (9) | | 39 (8) | | 6 (6) | |
| 53 (7) | 7 (16) | 15 (9) | 0 (0) | 33 (8) | 6 (19) | 5 (5) | 1 (25) |
|  | Busy or financial concerns | 63 (8) | | 15 (9) | | 46 (10) | | 2 (2) | |
| 62 (9) | 1 (2) | 15 (9) | 0 (0) | 45 (10) | 1 (3) | 2 (2) | 0 (0) |
| Perceptions of colonoscopy | |  | |  | |  | |  | |
|  | Painful | 253 (34) | | 76 (43) | | 159 (34) | | 18 (17) | |
| 237 (34) | 16 (38) | 73 (43) | 3 (50) | 146 (34) | 13 (41) | 18 (17) | 0 (0) |
|  | Embarrassing | 253 (34) | | 62 (35) | | 177 (38) | | 14 (13) | |
| 235 (33) | 18 (43) | 59 (35) | 3 (50) | 162 (37) | 15 (47) | 14 (13) | 0 (0) |
|  | Resistance to laxative use | 246 (33) | | 58 (33) | | 166 (36) | | 22 (20) | |
| 236 (33) | 10 (24) | 56 (33) | 2 (33) | 159 (36) | 7 (22) | 21 (20) | 1 (25) |
|  | Prefer female physicians | 181 (24) | | 56 (32) | | 110 (24) | | 14 (13) | |
| 167 (24) | 14 (33) | 54 (32) | 3 (50) | 99 (23) | 11 (34) | 14 (13) | 0 (0) |
|  | Low awareness of CSb | 69 (9) | | 21 (12) | | 36 (8) | | 12 (11) | |
| 68 (9) | 1 (2) | 21 (12) | 0 (0) | 35 (8) | 1 (3) | 12 (11) | 0 (0) |
|  | Do not know where to get CSbc | 34 (4) | | 12 (7) | | 13 (3) | | 9 (8) | |
| 34 (5) | 0 (0) | 12 (7) | 0 (0) | 13 (3) | 0 (0) | 9 (8) | 0 (0) |
|  | Do not know where sedation is available# | 21 (3) | | 4 (2) | | 14 (3) | | 3(3) | |
| 20 (3) | 1 (2) | 4 (2) | 0 (0) | 14 (3) | 0 (0) | 2 (2) | 1 (25) |
|  | No information available onlinec | 2 (0.2) | | 1 (0.5) | | 1 (0.2) | | 0 (0) | |
| 2 (0.2) | 0 (0) | 1 (0.6) | 0 (0) | 1 (0.2) | 0 (0) | 0 (0) | 0 (0) |

a Thirty participants with unknown residency were excluded. bCS: colonoscopy, cThese data are not shown in the figure.
